# Supplementary material for: Oral microbiome diversity and composition before and after chemotherapy treatment in pediatric oncology patients
Source: Research Square preprint supplement (doi:10.21203/rs.3.rs-5302958/v1), 2024-10-24
Supplement: Supplementary file 1 [file 63e912474d531fa7f9c82b0e.pdf]

| Group Description                                             | Inclusion Criteria                           |
|---------------------------------------------------------------|----------------------------------------------|
| Pretreatment Samples – Patients with Oral Mucosal Lesions     | WHO score $\geq 1$ and ChIMES grade $\geq 1$ |
| Pretreatment Samples – Patients without Oral Mucosal Lesions  | WHO score = 0 and ChIMES grade = 0           |
| Posttreatment Samples – Patients with Oral Mucosal Lesions    | WHO score $\geq 1$ and ChIMES grade $\geq 1$ |
| Posttreatment Samples – Patients without Oral Mucosal Lesions | WHO score = 0 and ChIMES grade = 0           |
| Posttreatment Samples – Patients using Caphosol Mouth Rinse   | Treatment group using Caphosol               |
| Posttreatment Samples – Patients using Saline Solution        | Treatment group using saline solution (NaCl) |
